# Supplementary material for: Metallogels through glyme coordination
Source: Royal Society of Chemistry journal article supplement (doi:10.1039/c6dt00255b), 2016-01-01
Supplement: c6dt00255b1.pdf [file c6dt00255b1.pdf]

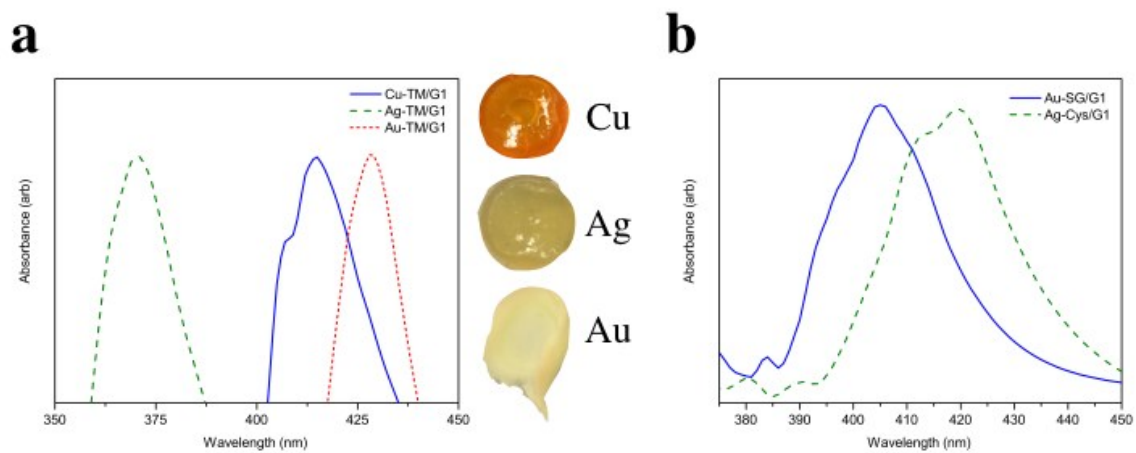

Fig S1

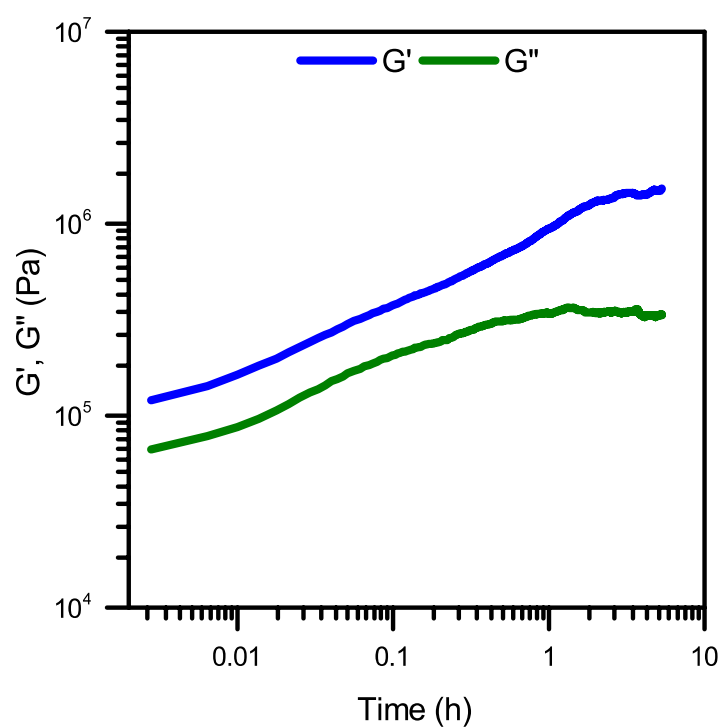

Fig S2

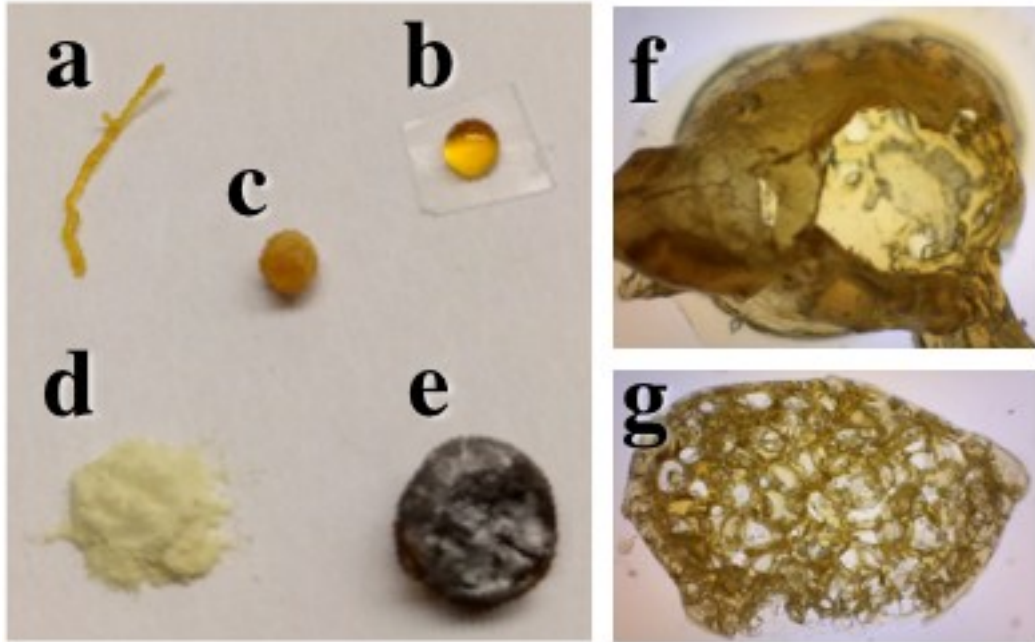

Fig S3

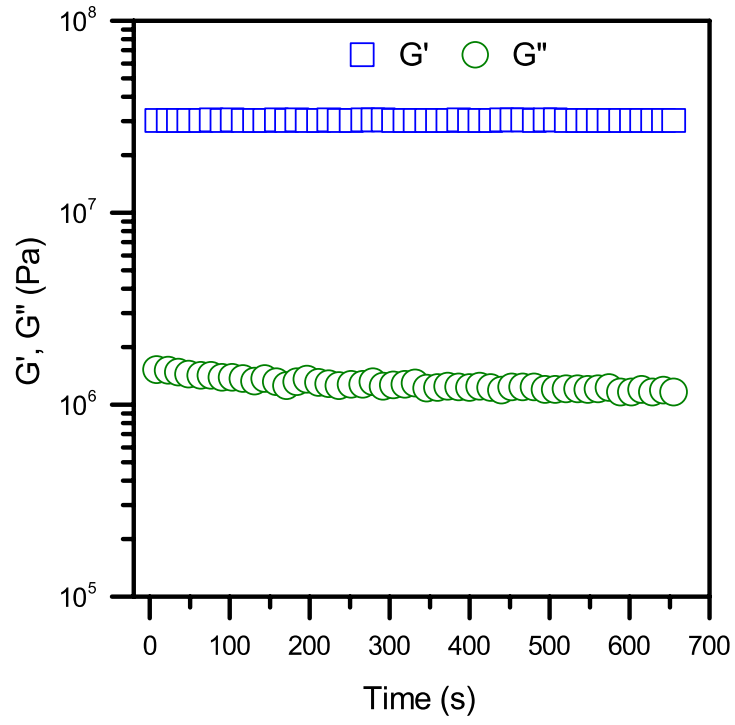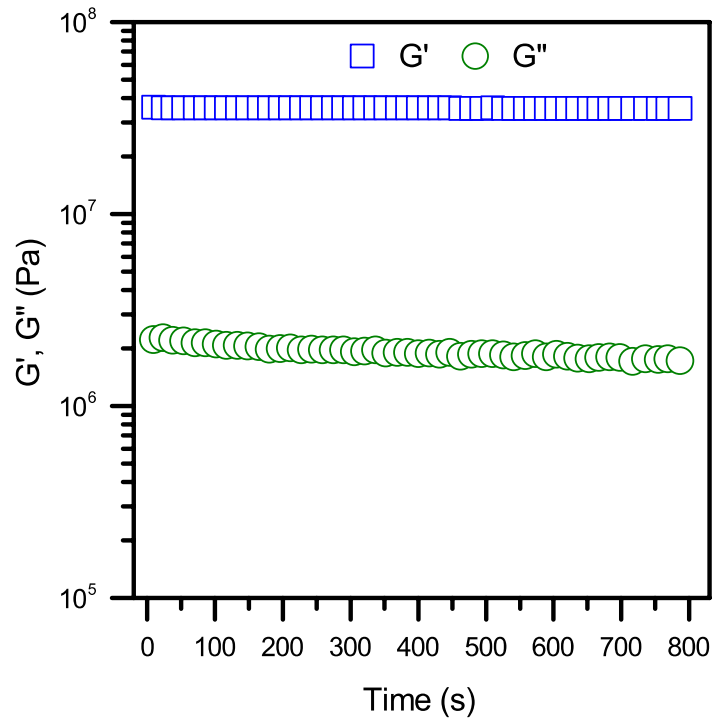

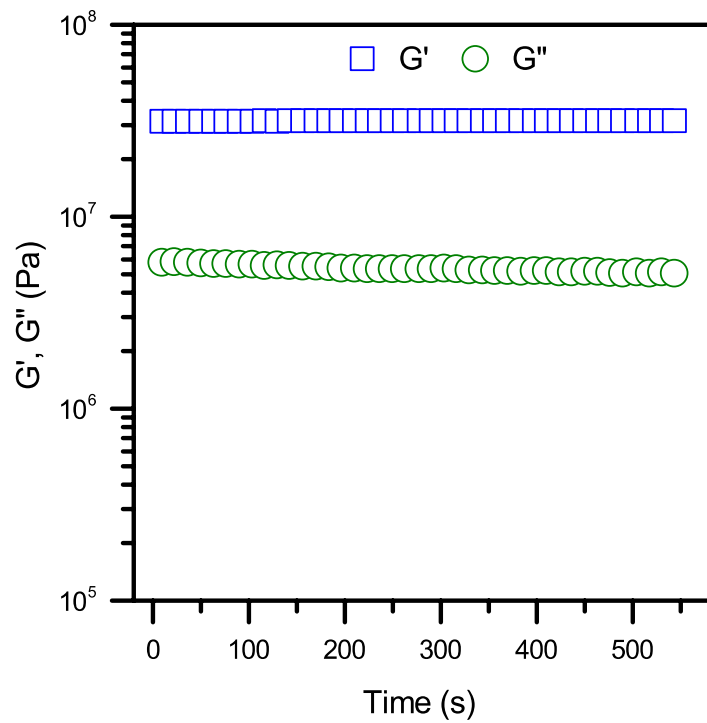

Fig S4a 1-3

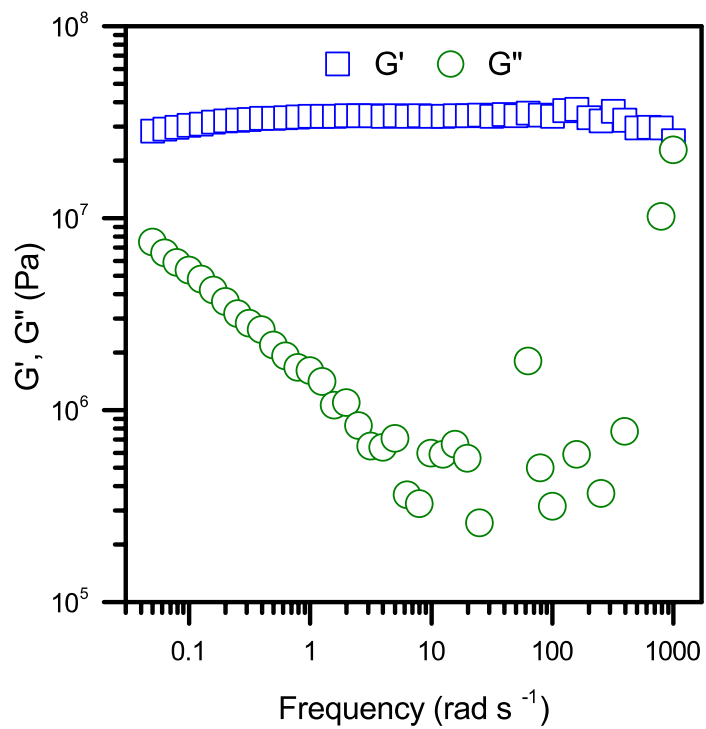

Fig S4b

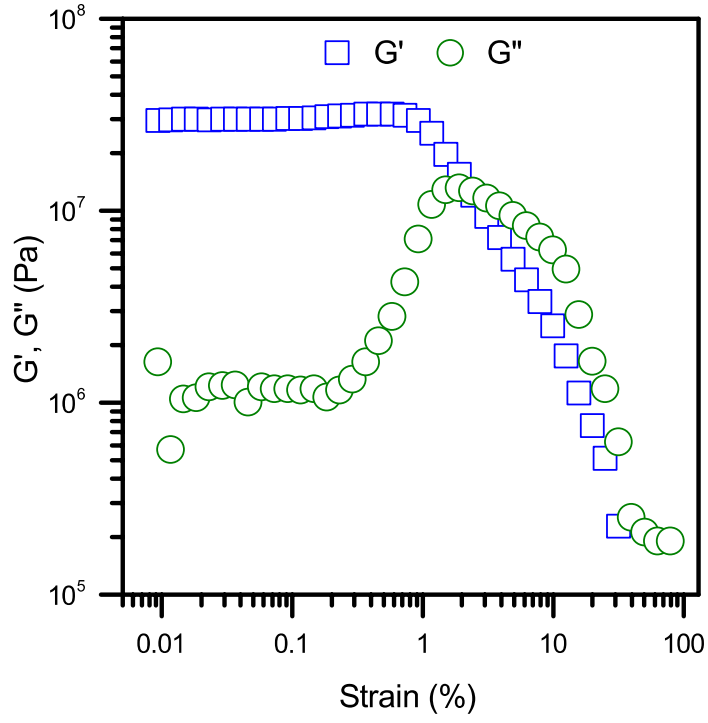

Fig S4c

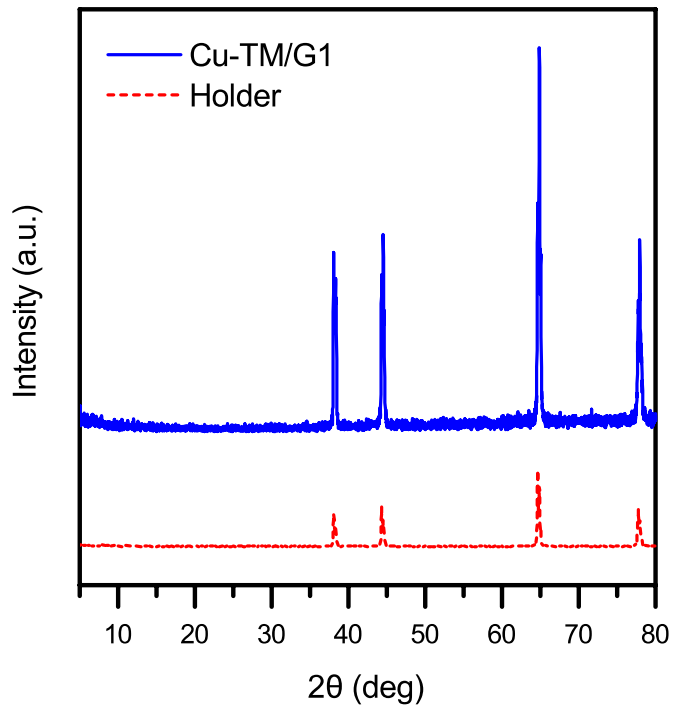

Fig S5a

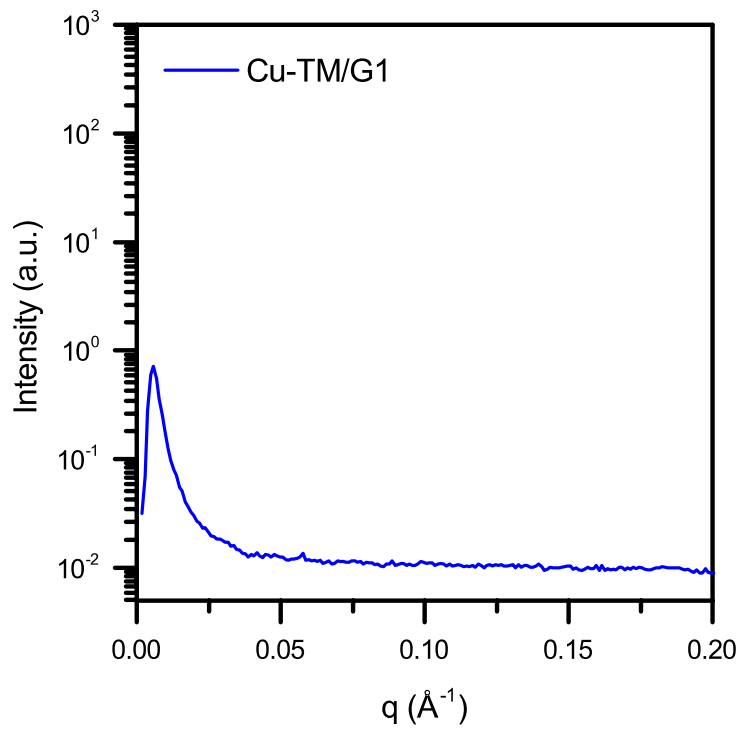

Fig S5b

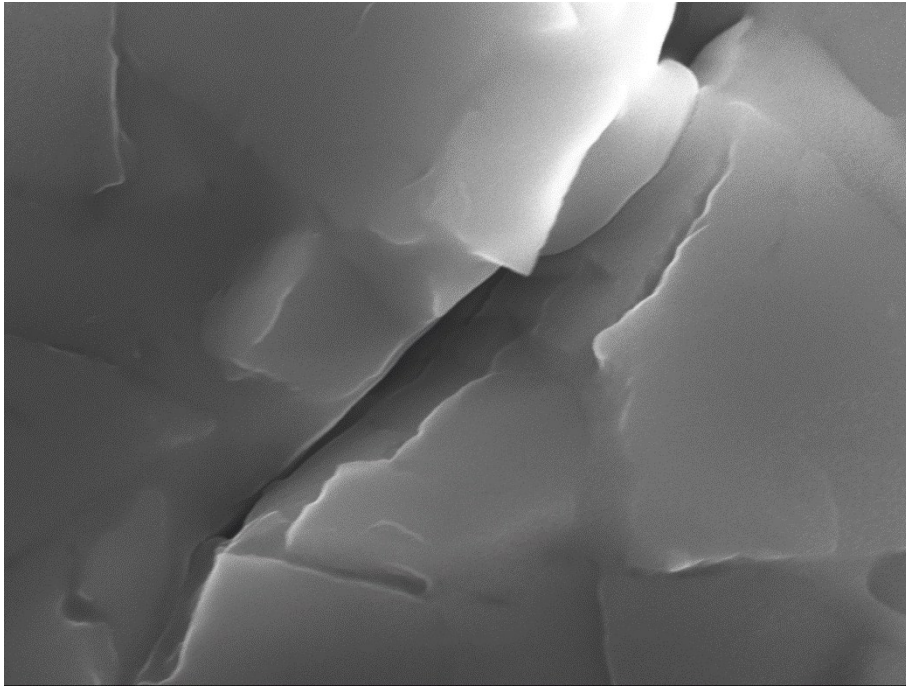

CSU SEI 15.0kV X16,000 WD 10.0mm 1μm

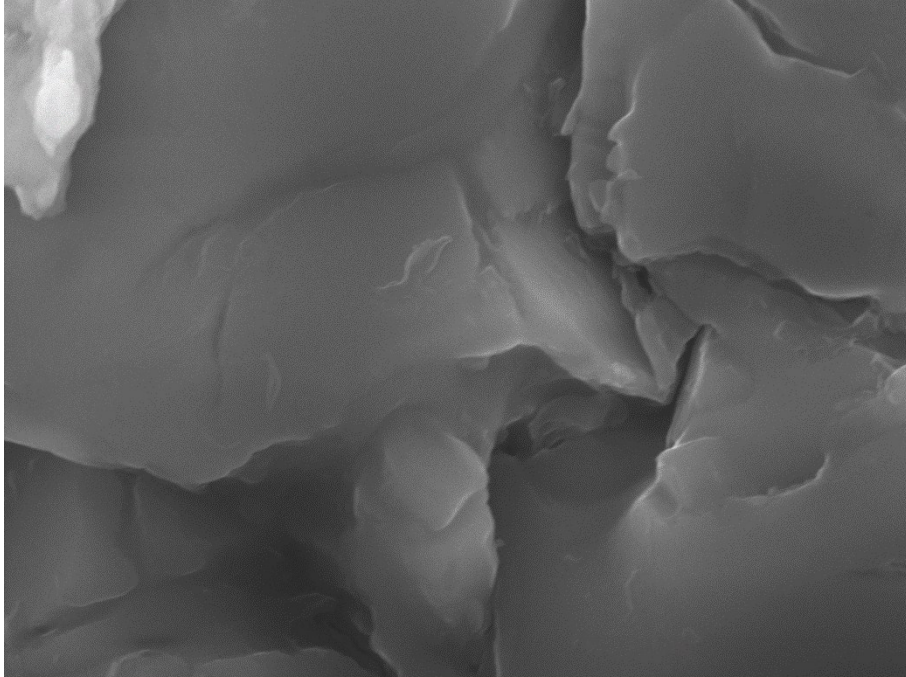

CSU SEI 15.0kV X15,000 WD 10.0mm 1μm

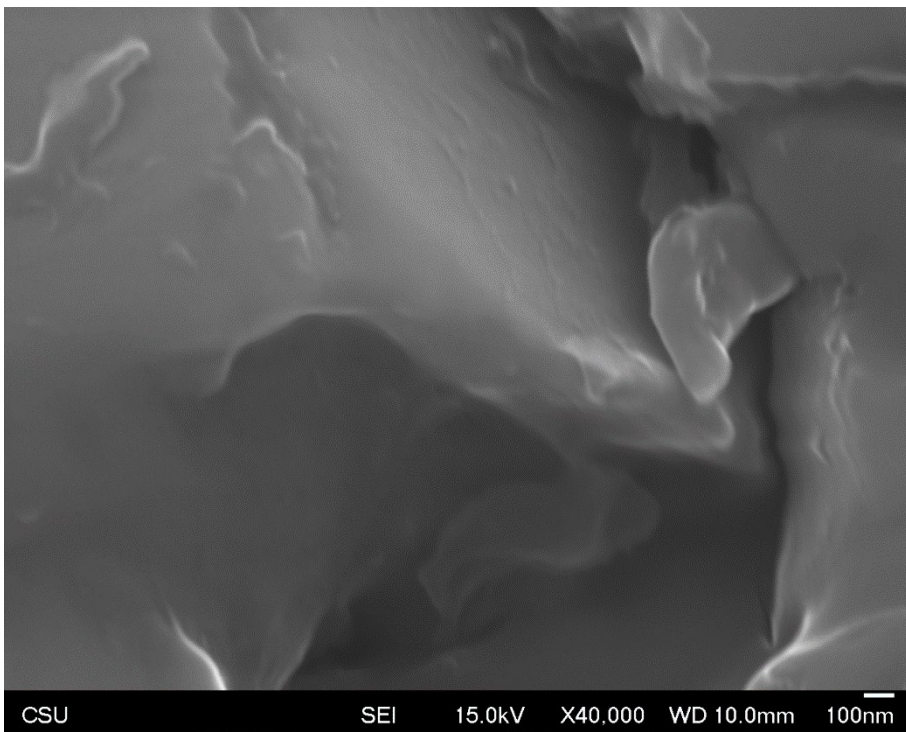

Fig S5c 1-3

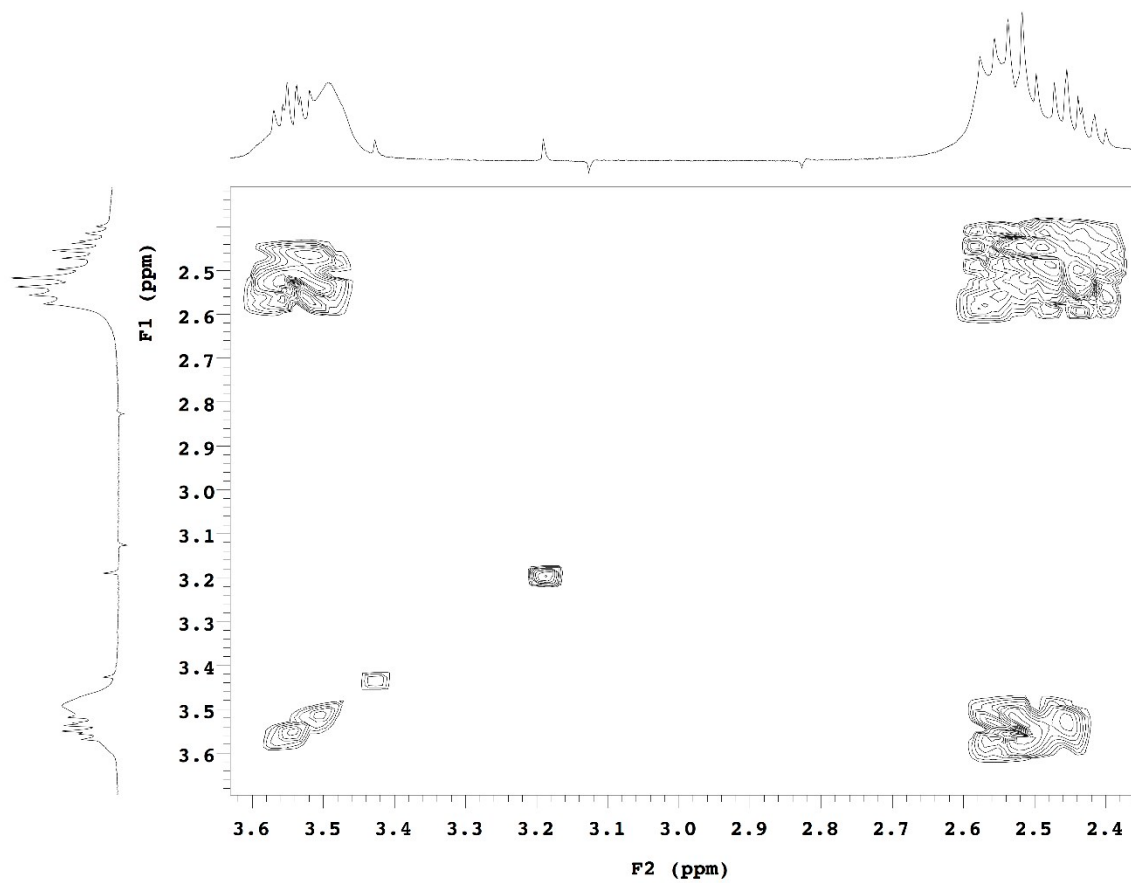

Fig S6



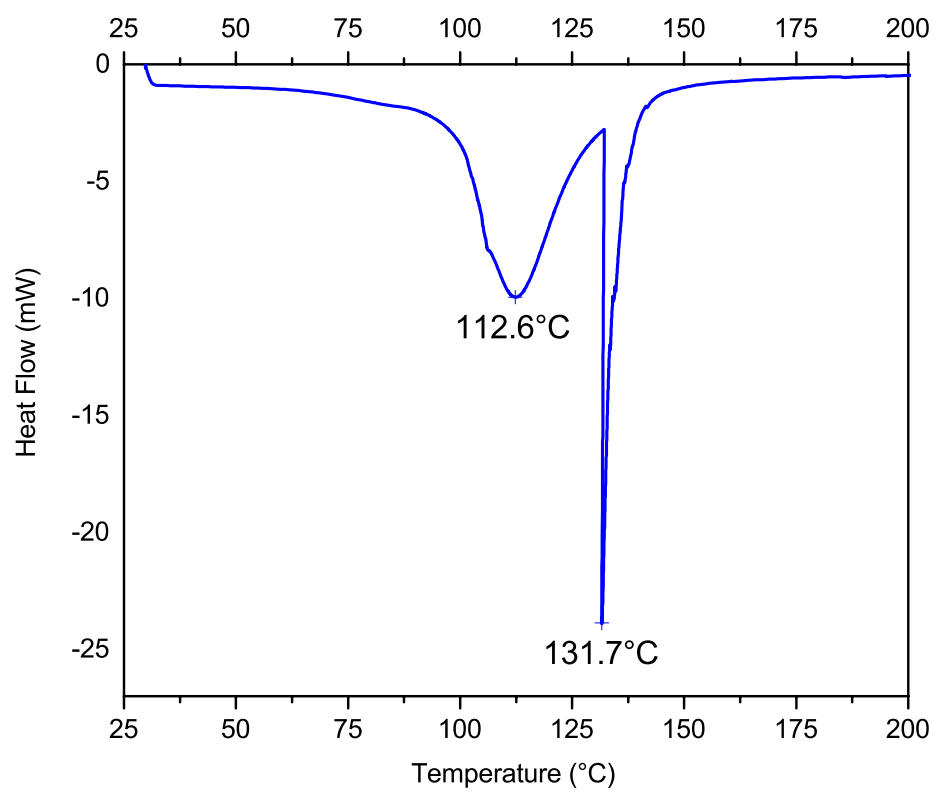

Fig S7

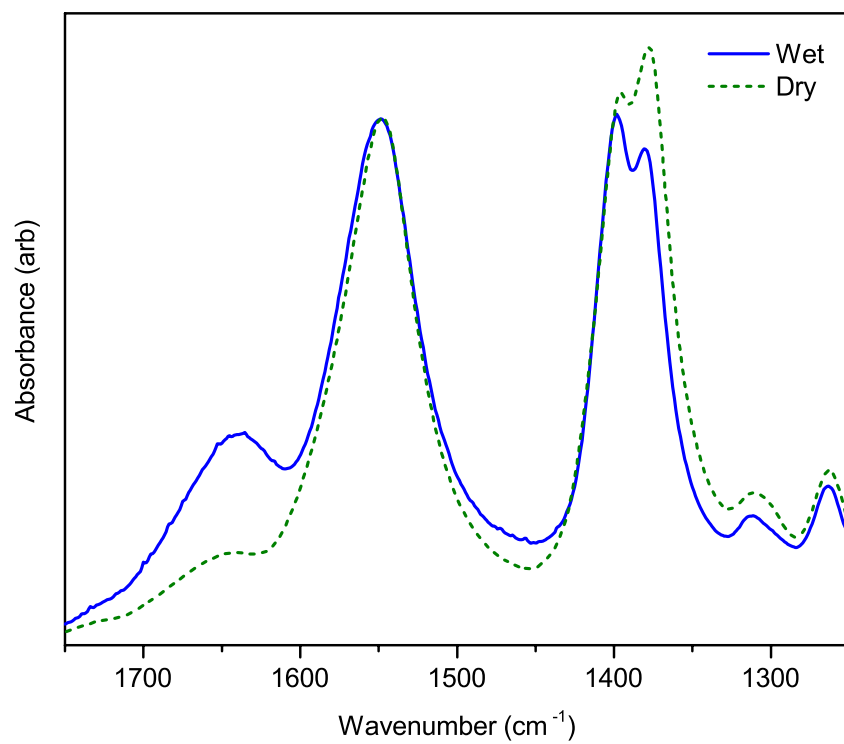

Fig S8

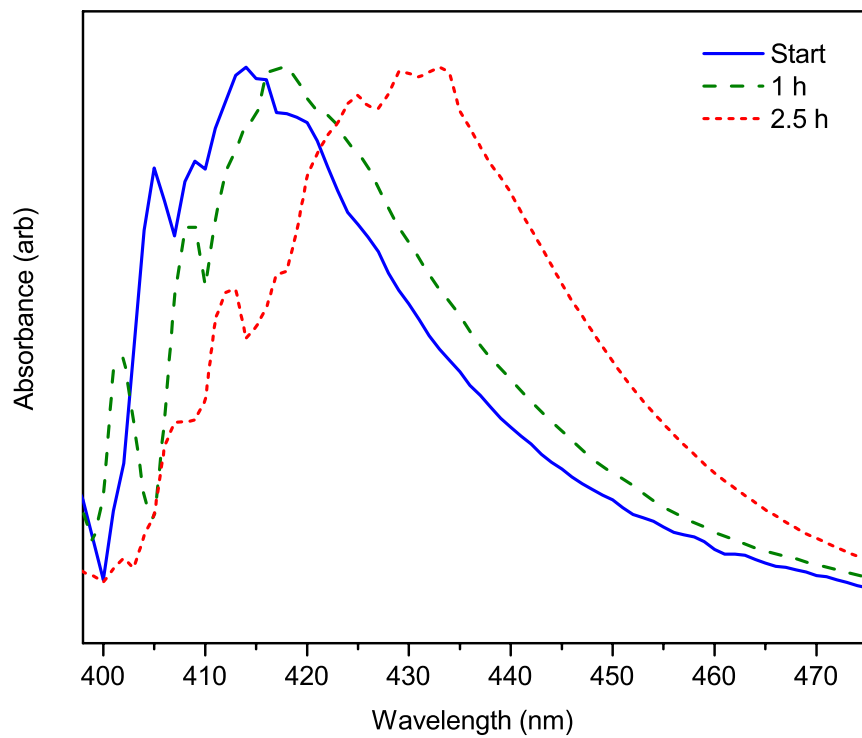

Fig S9a

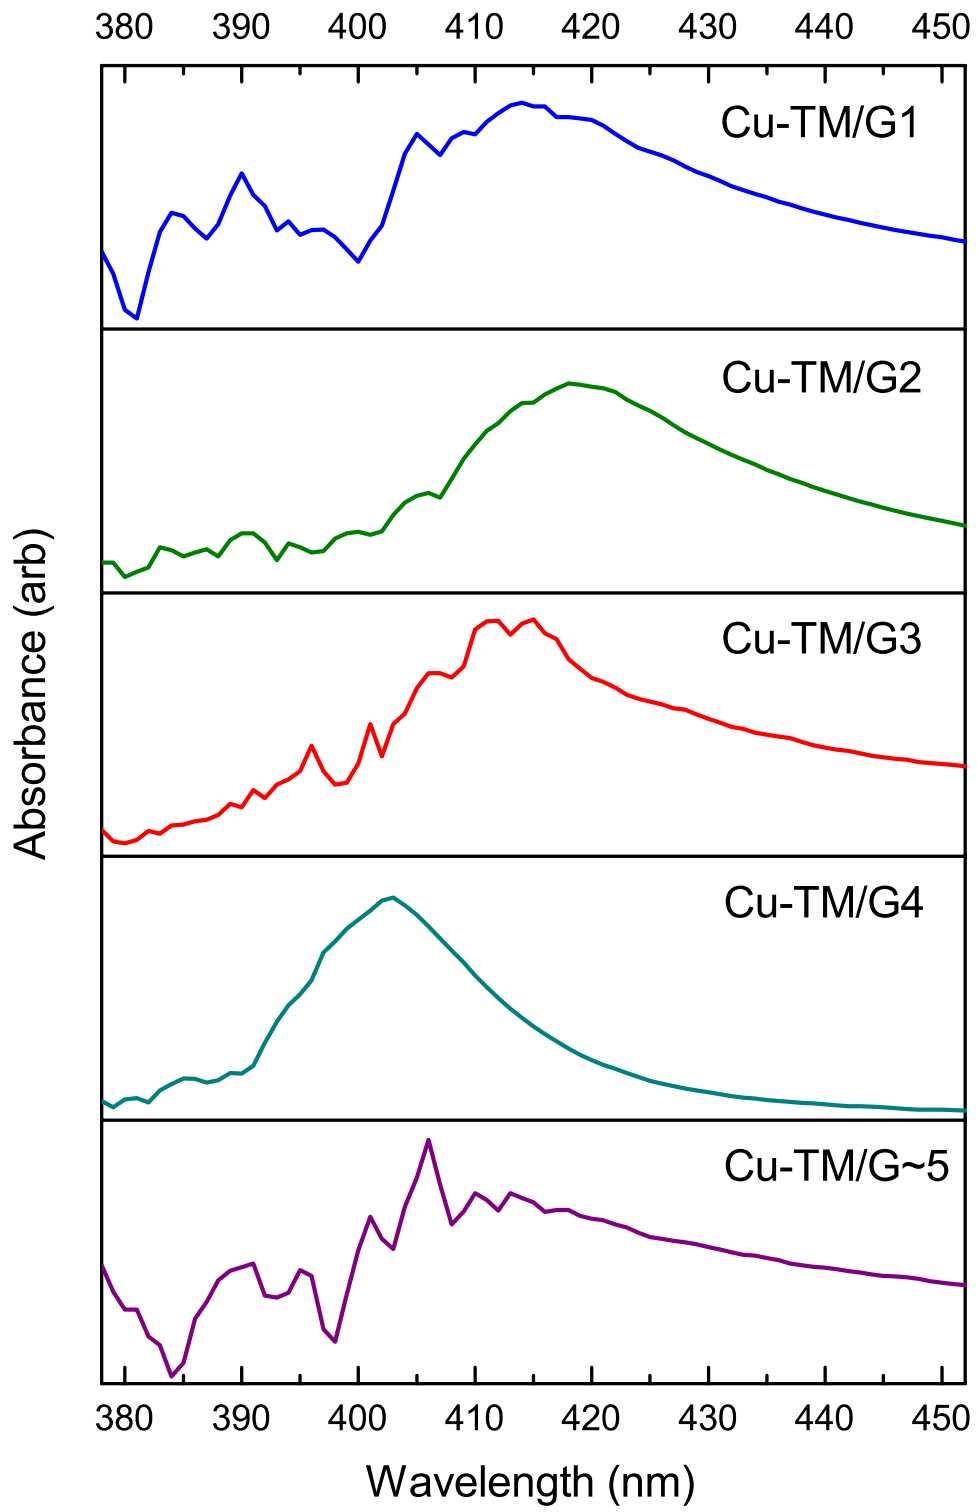

Fig S9b
